# Supplementary material
Source: PubMed Central journal article supplement (PMC7155424)
Supplement: NIHMS1574420-supplement-Suppl_Mat_1.pdf [file NIHMS1574420-supplement-Suppl_Mat_1.pdf]

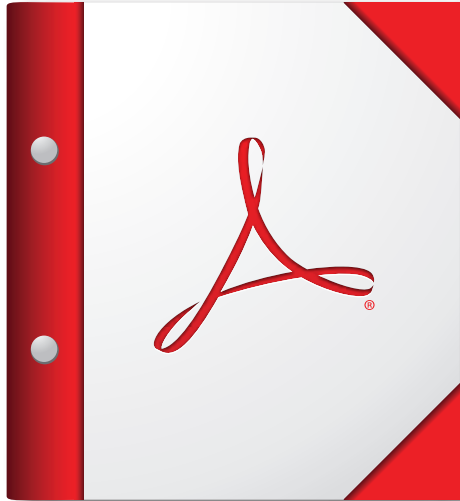

**For the best experience, open this PDF portfolio in  
Acrobat 9 or Adobe Reader 9, or later.**

[Get Adobe Reader Now!](#)
